# Supplementary material for: A-to-I RNA Editing in the Earliest-Diverging Eumetazoan Phyla
Source: PubMed Central journal article supplement — Mol Biol Evol. 2017 Apr 8;34(8):1890–901. doi: 10.1093/molbev/msx125 (PMC5850803; doi:10.1093/molbev/msx125), 2017-04-08
Supplement: msx125_supp.pdf [file msx125_supp.pdf]

## Supplementary Figure 1.

### Coral ADAR1

```
1 MTRKPYRFKE INLKLLATSQ TLQGVNPELL MEVCSSTPPL LLVIXKAARF
51 PKQTDPLPRQ TCRDDPETIS FQRNQPEALG NQANPPRSQS RASHGSLQQH
101 APTSVGHPQV NHSSSQGSGR IPPPPSANLY ENLVKRGQA VPTSSQNPLI
151 ASSRQPSRLS DLESKVIDFI RGHKKPIETL QLARQFGFQT KKQINPTLYK
201 LQSIGLIYKV HDQPPTWKIR QEVSSLTFSG SGAGNSSEVP LDRKRTHSDT
251 DDTATVCRHN PSRSQDNLSG TSVPSHSVHE MSAPQESSIS RPASGPWNLE
301 SSPQGYQGRQ NDPPDVLSSV AYAAMNKNPV SALNEYVQKN RMDLSFETLA
351 TRPTFAVAAK INGKLYPAAN ARNLKEAKRE AADFALRSLG GQGNVGRNA
401 NAASLHISNP SASTLSKATT HFDRIAALSH NAFLQIAATI ADKFAGRKVV
451 ACIIMKQGE DSGKVAVAGT GRCVTGERL SMEGNTVNDG AATVARSLSL
501 MRFFYRQLNS YHDGGESIFA SKQGSCKLVL RDGVSFHLVI STAFKGDGAL
551 FTPREESSAV LSEHSKEHNP TFTSKQQGIL RTKIEDGEGT IPIDPSDGIQ
601 TWDGLMRGKR LRTMSLSDKI CRWNVLGLQG ALSHFLEPV YLSSLTLGYL
651 YDHGHLGRAV CCRLQRNCDL NKQLPAPYHV NHPWLGCVTA YDPPRETEKT
701 NNLSVNWSIT DTSAEVTDGR TGACMTRTHK GTPPSRVCKA SLYESFKELL
751 AKVGRQELVN AESYSDAKKM ATAFCEAKWK LFEHFRSLKY GAWVSKPIEQ
801 EMF
```

### Coral ADAR2

```
1 MAEVCEGSTA PGIEADPENV AIPGLGDLPV STQESLKREN PSEEENAEAR
51 ATNDVDVSMK EEADSGTPPP KKKRRPNRGR SGTGLFDAQR ANKNSMLLLN
101 EIRPGLNYEV ISQEGPLHSP TFVVSVVVDG HSFEGKGS SKQAKHNAEEN
151 AFRSFISQMR TPAKRLFSGS QAEFKGLDT DFTSDNTGTL LNTFGNVEKP
201 PPDGKIESPE SMASESTLPS HKNHSNAQVS TEAGKHPVML LNEFHGQVQY
251 EFLGEGFDKN EKQFRFKVTI EEQEFVGVGS SKKKGKANAA SRALFALHSI
301 RTFYFSFGQS EARSKPMYLG PPSAQLDQQ AADLIADAVL AKFHNLAAS
351 GDDSLRRKVL ASIVMTRSDG SDQKFEVISL GTGKFCGE YMSDQGLAVI
401 YCHGELIARR SFLRFLFSQL ELCAEGYEED SIFEKKDSGL YGVRDYVEFH
451 LYINTSPGD AIFSPHEPV MGVADKHPGR RTRGLLRVKL ENEGGTIPAI
501 NGGTVIQTWD GVLQGERLRT MSKSDKLCRW NVTGIQGSLL SHFVEPIYLQ
551 SIVLGSLYHY EHMSRALYQR LGDLEGLPTL FKQNRPLMNG TSTPEPRATI
601 KSPGISVNWS EGDDGFEVNV ATQGVIOGDV PAPSRLCQS LFKRFICLWK
651 KLKPTESVPL SYHEAKNSVT DYCRAKHIAM QGFSAQGLGT WIQKPCEDM
701 FELPDQDD
```

green = dsRBMs

cyan = Z $\alpha$  domain

Yellow = catalytic domain

Red = Zinc Coordinating residues

Dark Red = glutamate for proton shuttling

Violet = other residues thought to be important for catalysis of adenosine

pink = conserved IP6 coordinating residues

Supplementary figure 1. **The conserved domains of coral ADAR.** Both coral ADAR contain conserved domains: Both contain double stranded RNA binding motifs (dsRBD, in green). While vertebrate ADAR1 contains 3 dsRBDs, coral only contains one. Coral ADAR2 contains 2 dsRBDs similarly to vertebrates. Coral ADAR1 contains a conserved  $Z\alpha$  (cyan) domain in its N-terminus compared to vertebrates containing both a  $Z\alpha$  and  $Z\beta$ . Both coral ADARs contain conserved deaminase domains (yellow) with most of the catalytic residues conserved between coral and vertebrate ADAR. These include zinc (red) and IP6 (pink) coordinating residues, glutamate for proton shuttling (dark red) and other residues thought to be important for the catalysis of adenosine (violet).

Supplementary Figure 2.

**a. Genomic localization of hyper-edited sites**

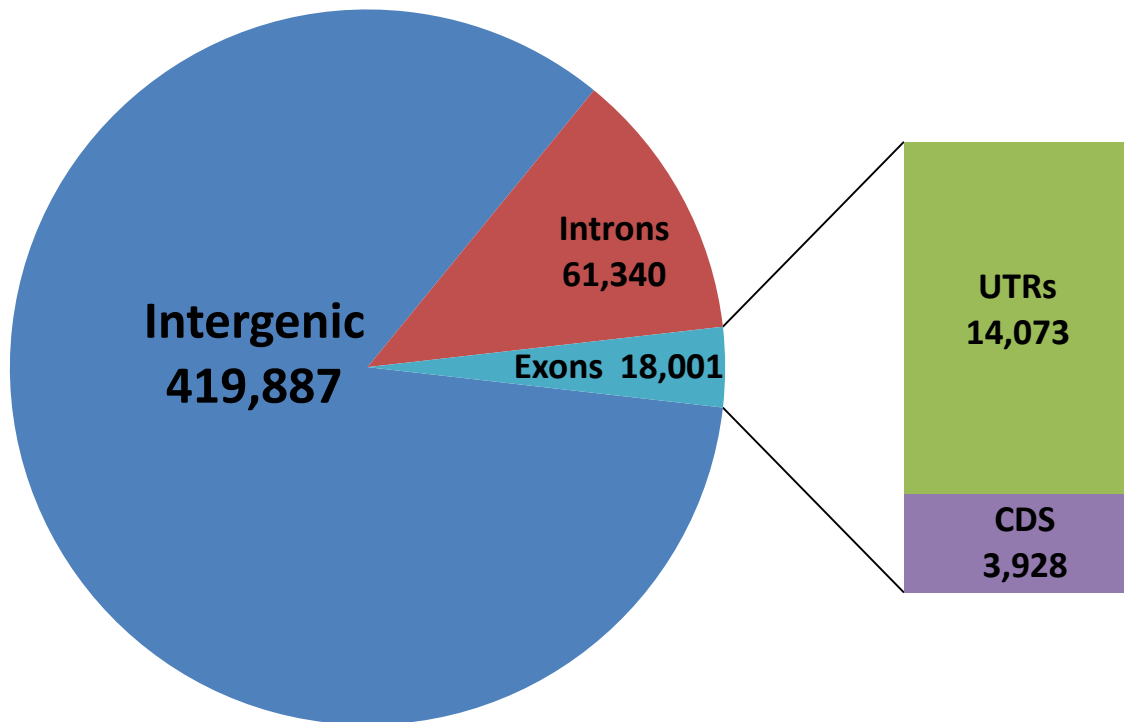

**b. Genomic localization of MuTect sites**

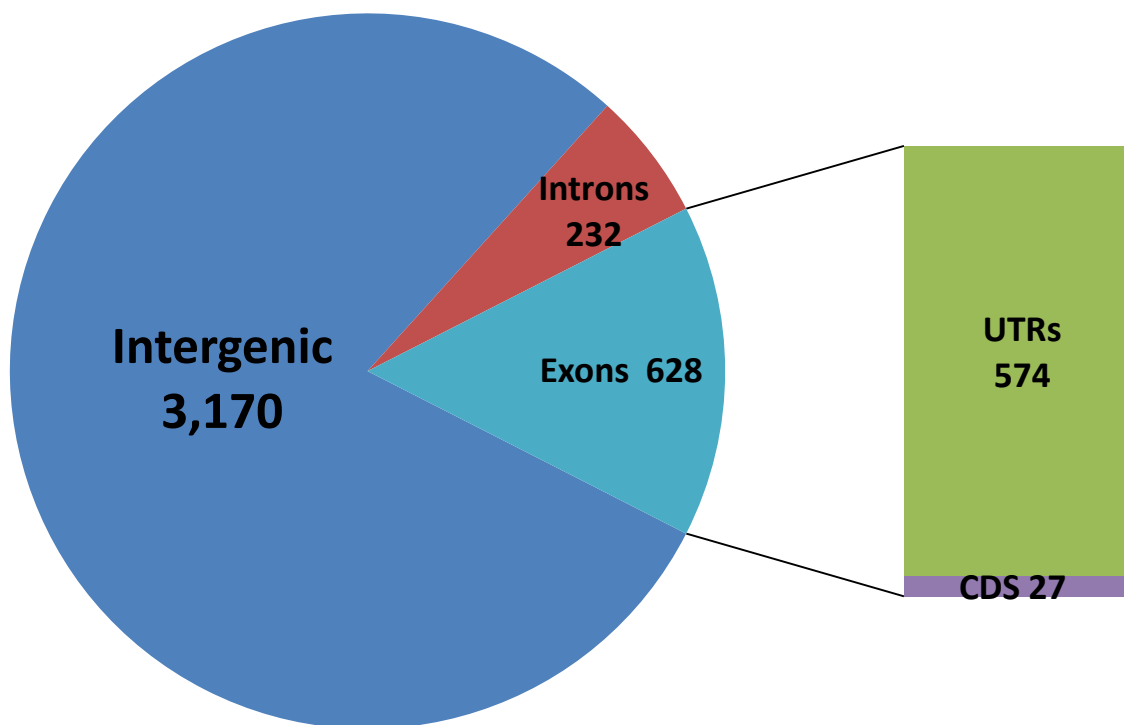

Supplementary figure 2. **Distribution of edited sites in coral transcriptome.** **a)** Hyper-edited sites. A total of 499,228 unique sites were found using the hyper-editing pipeline. Of these, 79,341 sites were found in genes. 61,340 sites were intronic and 18,001 sites were found in exonic regions, with 14,073 being in UTRs and 3,928 in coding regions. **b)** Editing sites found by MuTect. Of the A-to-G mismatches, roughly 20% were found in gene regions with only 27 out of the 628 being in coding regions.

Supplementary Figure 3

> *Acropora millepora* NODE\_1899612\_length\_377773\_cov\_21.822311: 204470-204770 (+)

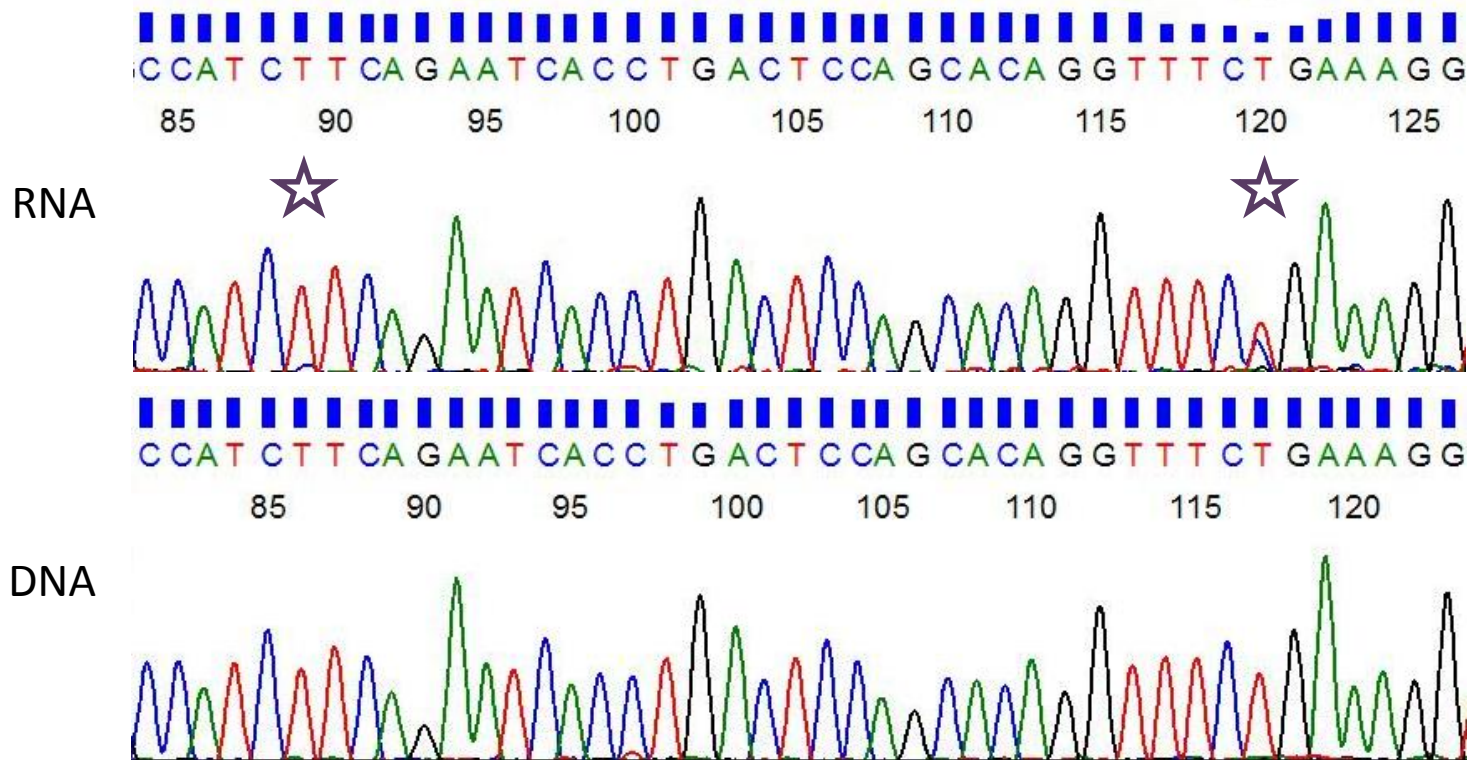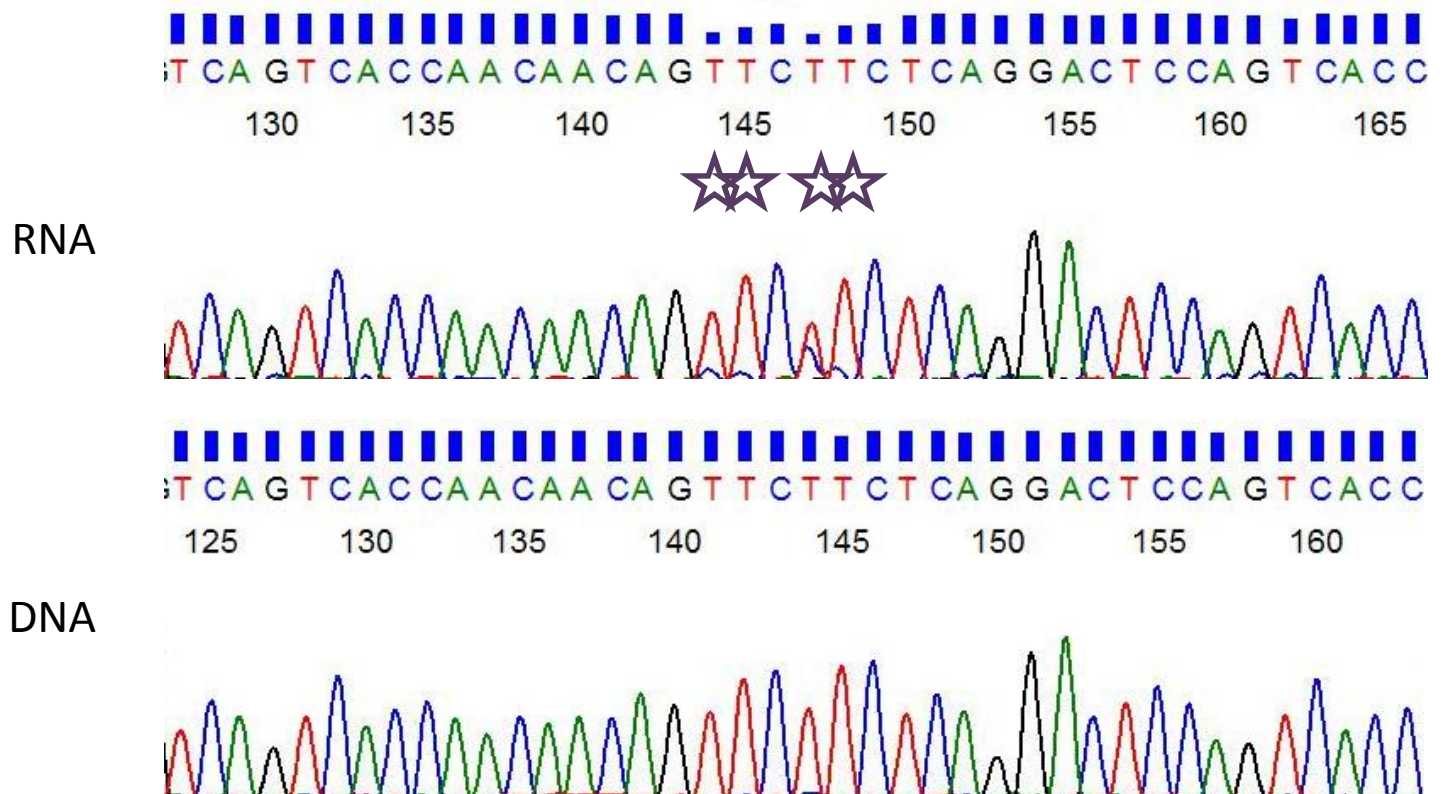

Supplementary figure 3. **Sanger sequencing chromatograms of edited region.** A

chromatogram of *Acropora millepora*, NODE\_1899612\_length\_377773\_cov\_21.822311: 204470-204770 (+), in the antisense of the predicted 3' UTR of Calcium-binding protein NCSA gene (Swiss-Prot accession number of the ortholog protein Q75K28; NCBI transcript accession number JR986886.1, GI:37908921). Chromatograms of genomic DNA are presented along with those of the corresponding cDNA (RNA) of. Bases are colored as: A- green, C- blue, G- black, T- red. Editing sites are usually evident as nucleotides having an A in the DNA and a G (or a mixed A/G signal) in the RNA, at the presented region the editing was occurred on the antisense strand, thus appears as a T in the DNA and a C (or T/C) in the RNA. The 7 validated editing sites are marked with purple stars.

Supplementary Figure 4.

a.

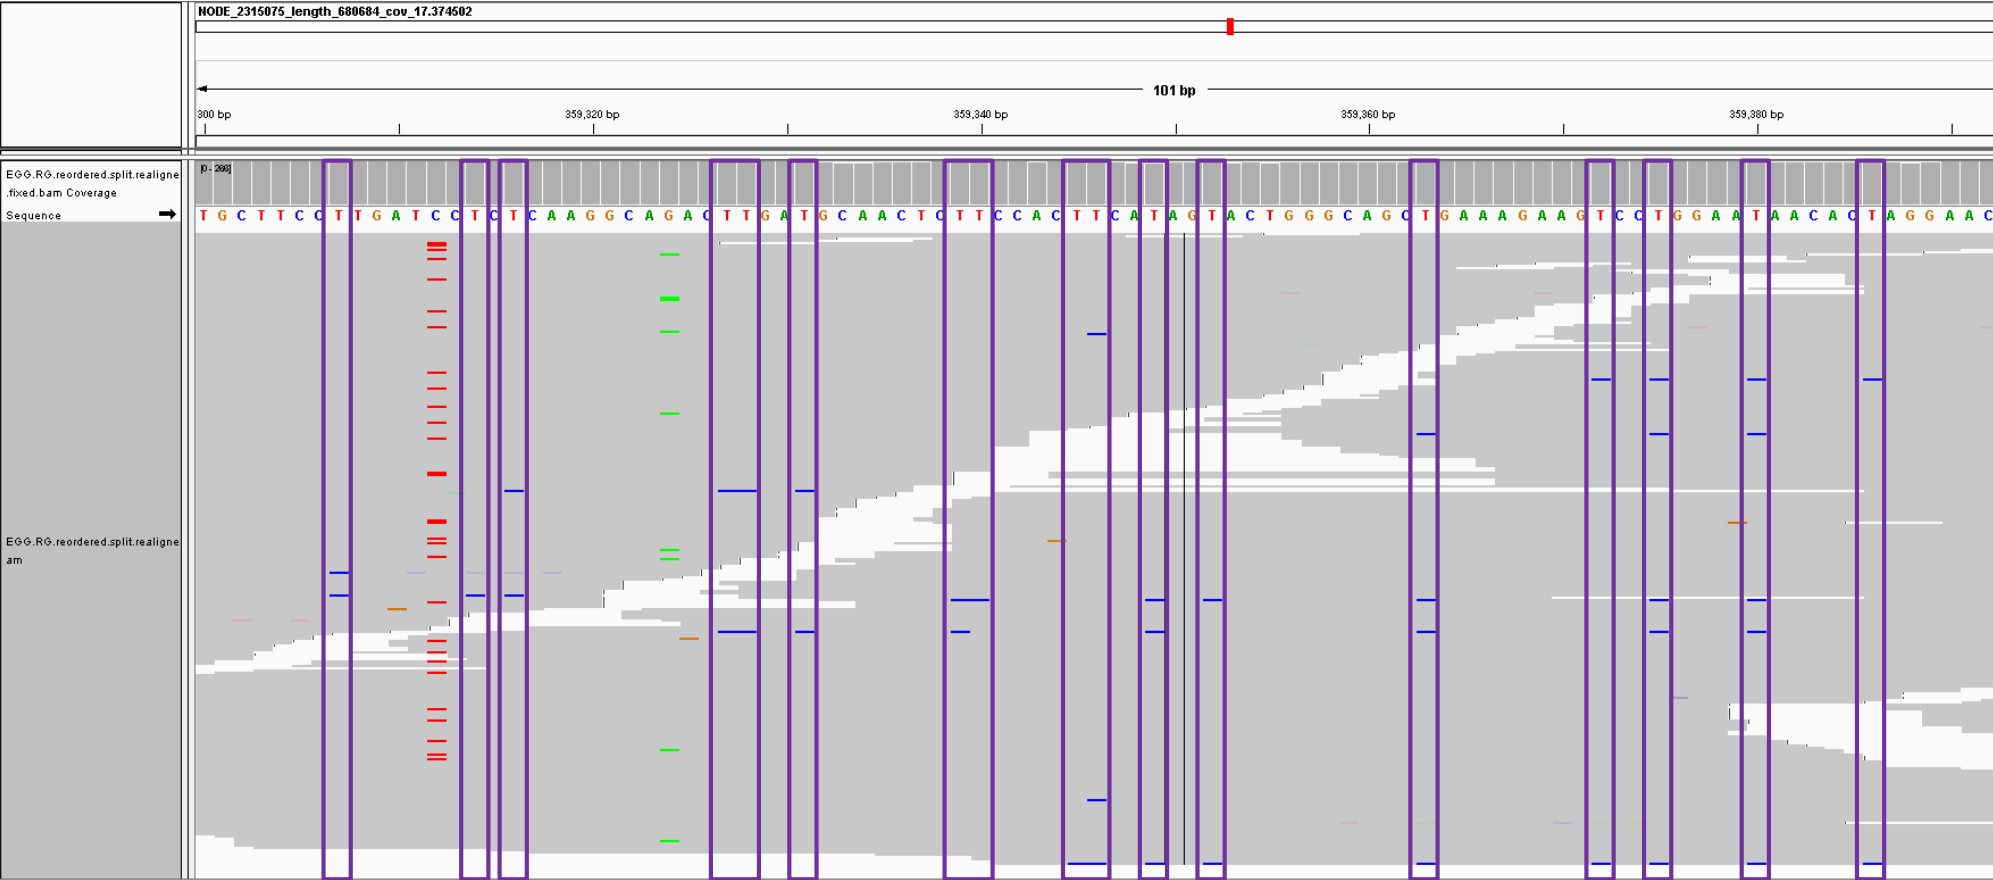

Supplementary Figure 4.

b.

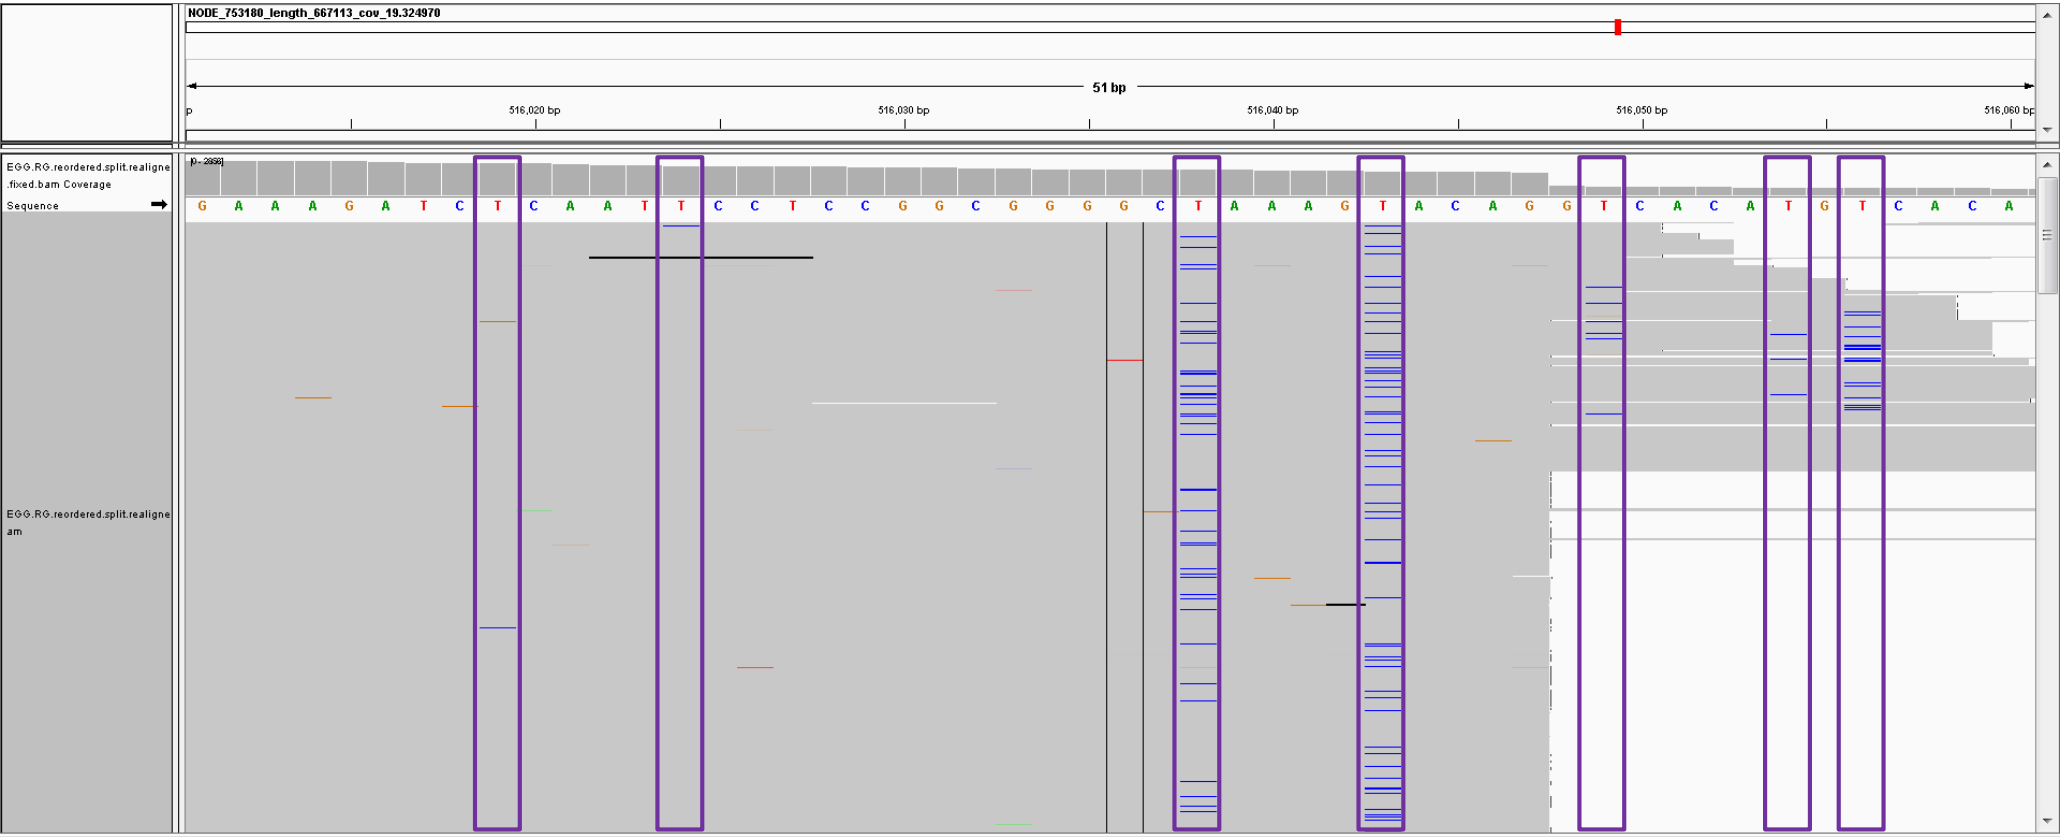



Supplementary figure 4. **Editing in coding regions of *Acropora millepora* egg sample.** Two examples of the reads composition in coding regions of **a)** RPGP1 (Rap1 GTPase- activating protein) and **b)** ADDA (Alpha- adducin) genes as seen in IGV (Thorvaldsdottir, Robinson, and Mesirov 2013). Detected editing sites are highlighted with purple square. Coding editing sites (mostly) cause nonsynonymous recoding of the protein sequences resulting in distinct protein variants that may function differently.

## Supplementary Figure 5.

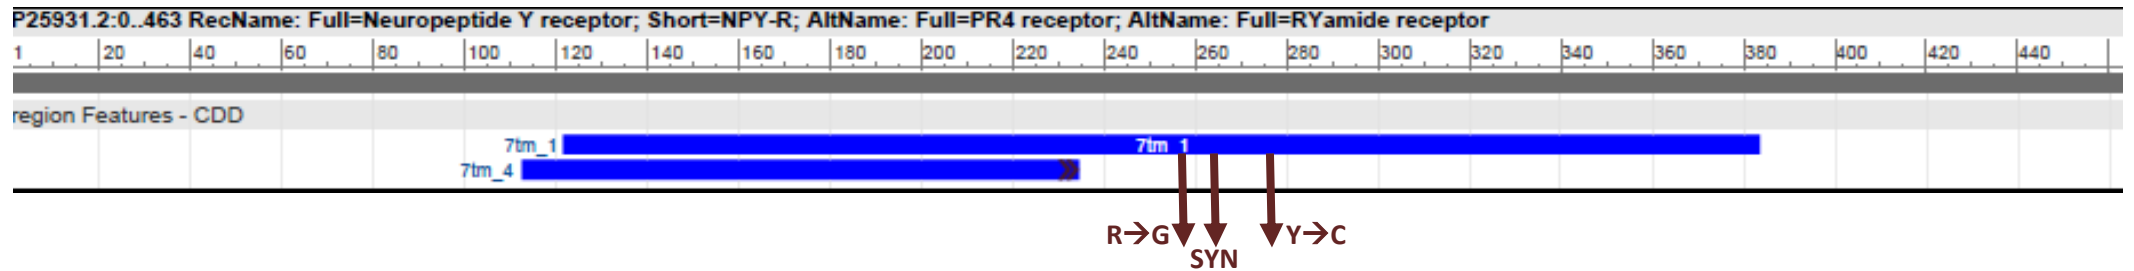

Supplementary figure 5. **Editing sites detected at *Acropora millepora* egg Neuropeptide Y receptor active site.** Example of putative alterations in a protein active site caused by RNA editing. The change of these AA in the functional 7 transmembrane domain could affect the folding and function of the protein, creating different active protein variants.

Supplementary Figure 6.

## Acropora digitifera RNA editing in coding regions in spawning and eggs

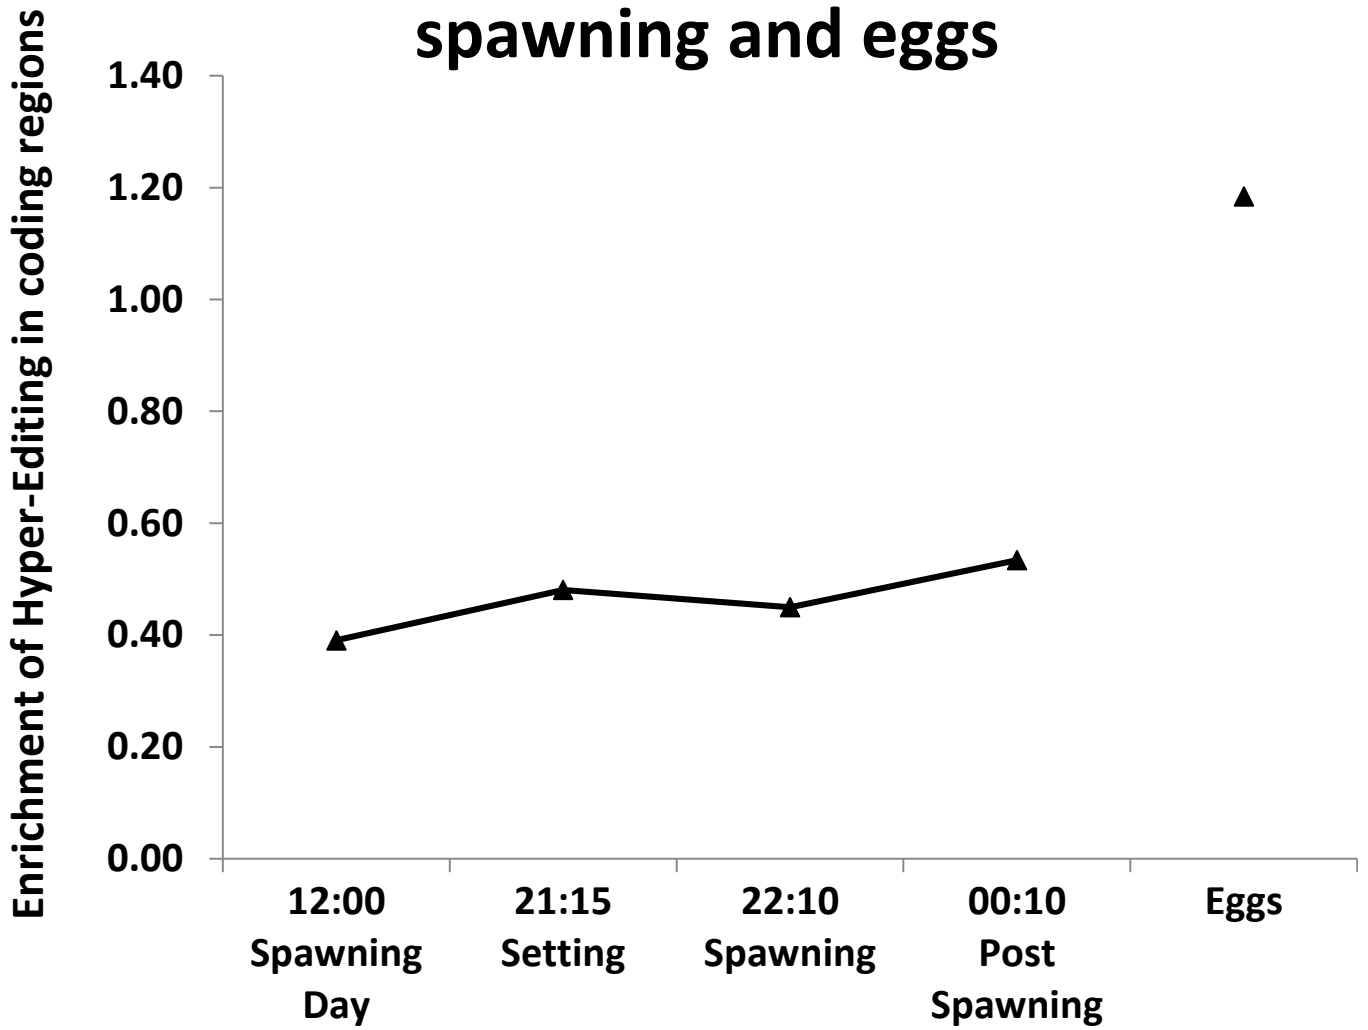

Supplementary figure 6. ***Acropora digitifera*: Comparison of enrichment of editing in coding regions of eggs and spawning adults.** *Acropora digitifera* eggs also showed enrichment of editing sites in the coding region similarly to the *Acropora millepora*. This result strengthens the proposed mechanism of utilizing editing to provide a beneficial mutation for selected gametes without relying on somatic changes in the egg genome.

**Supplementary Table 1.**

Primers used for PCR sequencing for sanger sequencing validation of editing in selected genes.

| Forward Primer |                              |        |        |             | Product Size (bp) | Reverse Primer |                              |        |        |             |
|----------------|------------------------------|--------|--------|-------------|-------------------|----------------|------------------------------|--------|--------|-------------|
| Name           | Sequence                     | Length | Tm (C) | GC Con. (%) |                   | Name           | Sequence                     | Length | Tm (C) | GC Con. (%) |
| 4-F            | GCTCAAACAGGT<br>CATGTCCT     | 20     | 57.8   | 50          | 527               | 4-R            | TGCGTTGACATA<br>CGTTGCTG     | 20     | 59.5   | 50          |
| 6-F            | AAATGGTTTGAG<br>CTCAGGGA     | 20     | 57     | 45          | 299               | 6-R            | TGCATTTTTGGG<br>CATGAAAGTCT  | 23     | 59.9   | 39.1        |
| 8-F            | CGGGTACGTGCC<br>GTGTAG       | 18     | 60.2   | 66.7        | 271               | 8-R            | TAAAAGGCAAGT<br>GTCAGGGC     | 20     | 58.4   | 50          |
| 14-F           | TGGCTTACTTGTT<br>TTCTAAGAGCA | 24     | 58.6   | 37.5        | 233               | 14-R           | TGTCCTATTTCCA<br>TCGTATTTGCT | 24     | 58.3   | 37.5        |
| 15-F           | TAGTTCAGCCC<br>TTGTGCTT      | 20     | 59.9   | 50          | 244               | 15-R           | AATGCGTCCAGC<br>TACCCTTA     | 20     | 59.7   | 50          |
| 18-F           | GTGCCAATAACC<br>CCAAAATG     | 20     | 60.1   | 45          | 614               | 18-R           | AGTGCCACTAAC<br>ACCCCAAA     | 20     | 60.4   | 50          |

**Supplementary Tables 2-5.**

<https://goo.gl/gP19O5>
